# Supplementary material for: Improving Cloud Type Classification of Ground-Based Images Using Region Covariance Descriptors
Source: Copernicus journal article supplement (doi:10.5194/amt-2020-189), 2020-08-07
Supplement: Supplementary file [file amt-2020-189-AC2-supplement.pdf]

## Response to Reviewer#3

Sincerest thanks for the comments on our manuscript entitled “Improving Cloud Type Classification of Ground-Based Images Using Region Covariance Descriptors” (amt-2020-189). These comments are very valuable and helpful for revising and improving our paper, and they also have important guiding significance to our research. We have studied comments carefully and made revisions which we hope meet with approval.

The main revisions in the paper and the responses to the reviewer’s comments are as following:

### **Reviewer #3:**

*The manuscript has structural issues, unclear formulations and lacks details in parts which hampers its ability to communicate the research to the reader. The manuscript lacks evidence of the physical relevance of the particular cloud types used - how specifically are these cloud types important for climate predictions and weather forecasting? In addition, there are structural issues in the manuscript, for example many sentences combine terms that are not on equal footing and often it is not detailed how and why specific assertions are evidenced. For example, in the introduction’s first sentence: it is true that "clouds have a strong impact" on "Earth’s energy budget", but it isn’t clear how clouds having a "strong impact" on "climate modelling" or "weather prediction". Further, line 24 goes on to talk about "weather monitoring" rather than "modelling" which are not equivalent. Finally, an extensive list of publications covering "cloud coverage measurement" and "cloud classification", but this publication doesn’t appear to be about "cloud coverage". The fact that there is "additional interest" doesn’t evidence that "cloud type classification" is in great need, or is that in fact what these papers state?*

Reply: Many thanks for the comment and we have added the content of how cloud types affect climate change in Introduction Section of the revised manuscript. Introduction is modified as follows:

“Clouds affect the Earth’s climate by modulating Earth’s basic radiation balance (Hartmann et al., 1992; Ramanathan et al., 1989). Cloud type variations are shown to be as important as cloud cover in modifying the radiation field of the earth–atmosphere system. For example, stratocumulus, altostratus, and cirrostratus clouds produce the largest annual mean changes of the global top-of-atmosphere and surface shortwave radiative fluxes (Chen et al., 2000). Cloud type is also one of the most reliable predictors of weather, e.g., cirrocumulus clouds are a sign of good weather. Therefore, accurate cloud type classification is in great need. Currently, the classification task is mainly undertaken by manual observation, which is labour-intensive and time-consuming. Benefiting from the development of ground-based cloud image devices, we are able to continuously acquire cloud images and automatically classify the cloud types.”

30 *The performance analysis is a bit weak as the datasets used are quite small in size (784 for SWIMCAT and 500 zenithal). I would suggest using data-augmentation (random rotations and zoom) to create two orders of magnitude more images to work with.*

35 Reply: Thanks for your concern. Data-augmentation is a great way to expand a limited dataset, especially for deep learning, however, it's not a magic bullet. One always runs the risk of overfitting the data model to the training samples if relying too much on data augmentation technique. If the dataset size expands to create two orders of magnitude more images, the distribution of the sample features may make the model deviate from the real data.

40 To validate the assumption, we conduct an experiment, in which we compare the predict accuracy of our model trained by data with/without augmentation. Let M1 and M2 denote the proposed model trained without and with data augmentation, respectively. In the training stage of M2, we randomly rotate and flip each training image to generate 9 more images, as shown in Fig. 1 and Fig. 2. The average accuracy obtained by 10-fold cross validation is reported in Table 1. The experiment result shows that, compared to M2, M1 acquires higher recognition accuracy on both datasets. The reason is that the RCovDs used in our model owns rotation and scale invariance characteristics. Moreover, the BoF method makes no use of the location information of RCovDs. Therefore, based on the experimental result, it seems that the data augmentation technique does not significantly improve the accuracy of the proposed model. Others, as mentioned in the paper, one purpose of our model is to address the dilemma that how we can obtain a high cloud type recognition accuracy even with a limited training set.

45 Table 1. The accuracy of M1 and M2 test on SWIMCAT and *zenithal* dataset.

|                                              | Accuracy of SWIMCAT dataset | Accuracy of <i>zenithal</i> dataset |
|----------------------------------------------|-----------------------------|-------------------------------------|
| Model trained without data augmentation (M1) | <b>98.4%</b>                | <b>98.6%</b>                        |
| Model trained with data augmentation (M2)    | 97.7%                       | 94%                                 |

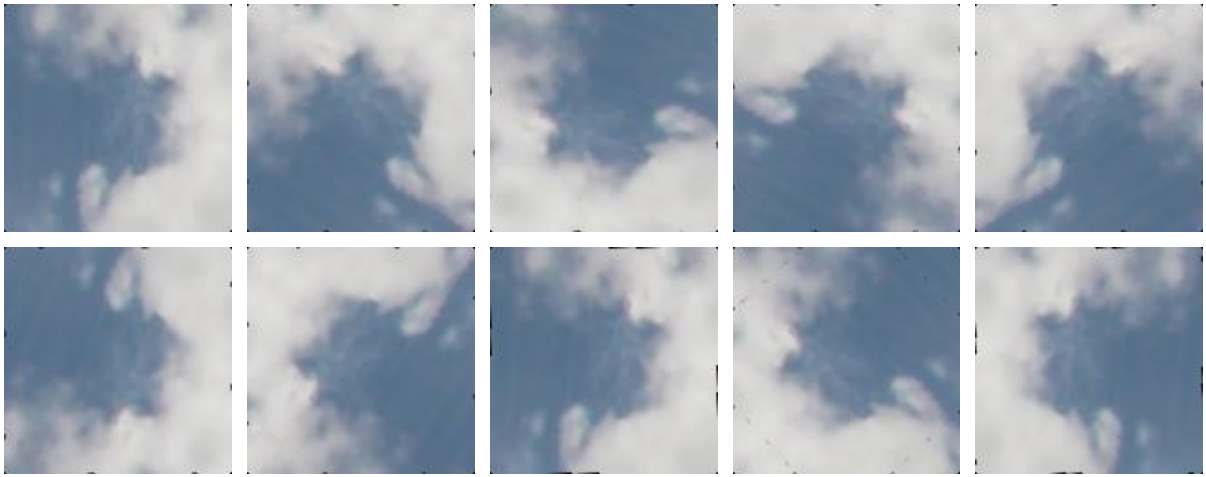

Figure 1 Samples of SWIMCAT data augmentation. The upper left image is the original image, and the other images are generated by random flip and rotation.

50

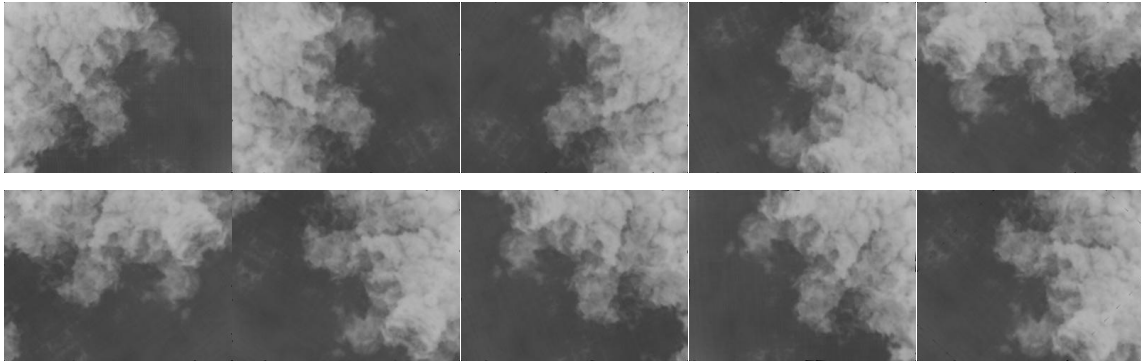

Figure 2 Sample of *zenithal* data augmentation. The upper left image is the original image, and the other images are generated by random flip and rotation.

55 *In addition, because random subsets of the datasets are used for training and validation it is unclear to me whether the performance difference to prior work is actually due to random chance (training/testing on easier partition if the datasets) or whether the technique presented here is indeed better. It is common in machine learning datasets to train all models on the same training set and validate against the same validation set.*

Reply: To evaluate the performance of machine learning model, we need to test it on unknown data (or first seen data). Cross  
 60 validation is one of the techniques used to test the effectiveness of a machine learning model. To perform cross validation, we need to keep aside a sample/portion of the data on which is not used to train the model, later use this sample for testing/validating. The commonly used cross validation techniques are ***holdout method*** and ***k-fold cross validation***.

In the holdout method, we randomly split complete data into training and test sets, ideally split the data into 70%:30% or 80%:20%. Then perform the model training on the training set and use the test set for validation purpose. In typical cross-validation, results of multiple runs of model-testing are averaged together; in contrast, the holdout method, in isolation, involves a single run. The disadvantage of the holdout method is that the performance evaluation is sensitive to the split ratio of the training set and the validation set. It should be used with caution because without such averaging of multiple runs, one may achieve highly misleading results. If our data is huge and our test samples and train samples have the same distribution, then this approach is acceptable. Therefore, this method is usually used in deep learning models with **large scale dataset**.

In  $k$ -fold cross validation is a popular technique that generally results in a less biased model. Because it ensures that every observation from the original dataset has the chance of appearing in training and test set. This is one among the best approach if we have a **limited input data**. This method follows the below steps: (1) Split the entire data randomly into  $k$  folds. (2) Then train the model using the  $k-1$  folds and validate the model using the remaining  $k$ -th fold. (3) Repeat this process until every  $k$ -fold serve as the test set. Then take the average of the recorded scores. That will be the performance metric for the model.

In our experiment, as the data size is limited, we choose  $k$ -fold cross validation for model validating. All comparison methods are conducted under the exact same training/test set partition during each  $k$ -fold cross validation process. There won't be a convincing problem since we repeat 50 times  $k$ -fold cross validation and take the average accuracy as final result.

*Specific comments:*

*Abstract:*

*l 10: "Cloud types are important indicators of ... short-term weather forecasting" – this sentence doesn't make sense. "Cloud types" can't "indicate" "weather forecasting. "The meteorological researchers can benefit from the automatic cloud type recognition of massive images captured by the ground-based imagers". Why is this true? Also, I would leave out "The" in "The meteorological" and the word "massive".*

Reply: Thanks for your concern. Currently, the classification task is mainly undertaken by manual observation, which is labour-intensive and time-consuming. Benefiting from the development of ground-based cloud image devices, we are able to continuously acquire cloud images and *automatically* classify the cloud types. We will delete the first two sentences “Cloud types are important indicators of ... captured by the ground-based imagers.”. Following sentences will be added at the beginning of the Abstract.

“The distribution and frequency of occurrence of different cloud types affects the energy balance of the earth. Automatic cloud type classification of images continuously observed by the ground-based imagers cloud help climate researchers uncover the relationship between cloud type variations and climate change.”

l 12: "However, by far it is still of huge challenge to design a powerful discriminative classifier for cloud categorization" - why is it a huge challenge?

95 Reply: Thanks for your comment. The challenges are explained in Introduction Section. The main challenges of the ground-based cloud image classification task can be ascribed to the following reasons: (1) One single feature cannot effectively describe different types of clouds, we need to extract textural, structural, and statistical features simultaneously. (2) The scale of cloud varies greatly, therefore, the extracted features should be robust in the presence of illumination changes and nonrigid motion. (3) Different cloud types may have similar local characteristics, and thus the global features need to be considered.

100 l 14: "BoF is extended from Euclidean space to Riemannian manifold by  $k$ -Means clustering, in which Stein divergence is adopted as a similarity metric" - what is the relevance of this? Why is this done?

Reply: RCovDs are Symmetric Positive Defined (SPD) matrices and naturally reside in a Riemannian manifold, therefore, the traditional Euclidean distance metric is no longer applicable. In other words, in the process of  $k$ -Means clustering, when measuring similarity between two features, the traditional Euclidean distance metric will be replaced by the version of Riemannian manifold; that is Stein divergence in our paper. Also, the machine learning algorithms on Euclidean space should be adapted as well. Thus, we encode all RCovDs of one image into a histogram-like feature (vectorized feature) by using Riemannian counterpart of the conventional BoF, taking the geodesic distance of the underlying manifold as the metric.

l 15: "The histogram feature is extracted by encoding RCovDs of the cloud image blocks with BoF-based codebook" - the term "histogram feature" hasn't been explained yet, what is this? How is it relevant to the technique/results of this paper?

110 Reply: A bag of features is a vector of occurrence counts of a vocabulary of local image features, that is, a sparse histogram over the vocabulary. The specific steps of BoF method are as follows (Jégou et al., 2010):

1. Feature extraction: Extract local image descriptors of each image in the training set.
2. Quantization: Descriptors are quantized into visual words with the  $k$ -Means algorithm.
3. Image representation: An image is then represented by the frequency histogram of visual words obtained by assigning each descriptor of the image to the closest visual word.

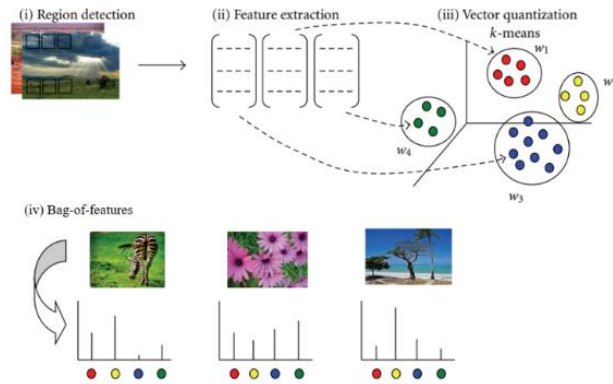

115

Figure 3 Four steps for constructing the bag-of-features for image representation.(Tsai, 2012)

The  $k$ -dimensional vector is called histogram feature. BoF describes an image as a vector from a set of local descriptors, and it aggregates the local features to obtain a global histogram representation. In fact, to encode and describe an image with the histogram vector, a good classification result can be achieved. Moreover, BoF has a dimensionality reduction effect, which will be much more effective for the subsequent SVM classification process.

120

*l 17: "The experiments on the ground-based cloud image datasets validate the proposed method and exhibit the competitive performance against state-of-the-art methods." - this should instead specify exactly what the improvements on previous work is, give the numbers that indicate the improvement and what the implications of these improvements are.*

Reply: Many thanks for the valuable comment. The last sentence of the Abstract will be changed as follows:

125 “The experiments on the ground-based cloud image datasets shows that a very high prediction accuracy (more than 98% on two datasets) can be obtained with a small number of training samples, which validate the proposed method and exhibit the competitive performance against state-of-the-art methods.”

*General:*

130 *- the section on "Feature extraction" should be before "Region Covariance Descriptors" since the covariance descriptors used the features.*

Reply: Thanks for your reminder. These two sections will be interchanged in the revised manuscript.

*l 102: the relationship between  $w$  in the "Rectangular region  $R$  with size  $w \times w$ " and the width of the input image isn't specified.*

Reply: Thanks for the comment. The relationship between  $w$  and rectangular region  $R$  is illustrated in **Section 3.1**.

135 **Once again, thank you very much for your creative comments and suggestions.**

## References

- Chen, T., Rossow, W. B., and Zhang, Y.: Radiative Effects of Cloud-Type Variations, *J. Clim.*, 13, 264-286, 10.1175/1520-0442(2000)013<0264:reoctv>2.0.co;2, 2000.
- 140 Hartmann, D. L., Ockert-Bell, M. E., and Michelsen, M. L.: The Effect of Cloud Type on Earth's Energy Balance: Global Analysis, *J. Clim.*, 5, 1281-1304, 10.1175/1520-0442(1992)005<1281:Teocto>2.0.Co;2, 1992.
- Jégou, H., Douze, M., and Schmid, C.: Improving Bag-of-Features for Large Scale Image Search, *Int. J. Comput. Vision*, 87, 316-336, 10.1007/s11263-009-0285-2, 2010.
- Ramanathan, V., Cess, R., Harrison, E. F., Minnis, P., Barkstrom, R. B., Ahmad, E., and Hartmann, D.: Cloud-radiative forcing and climate: Results from the Earth's radiation budget, *Science*, 243, 57-63, 10.1126/science.243.4887.57, 1989.
- 145 Tsai, C.-F.: Bag-of-Words Representation in Image Annotation: A Review, *ISRN Artificial Intelligence*, 2012, 376804, 10.5402/2012/376804, 2012.
